# Supplementary material for: Modelling primaquine-induced haemolysis in G6PD deficiency
Source: eLife. 2017 Feb 4;6:e23061. doi: 10.7554/eLife.23061 (PMC5330681; doi:10.7554/eLife.23061)
Supplement: Figure 4—source data 1. — DOI: http://dx.doi.org/10.7554/eLife.23061.007 [file elife-23061-fig4-data1.xlsx]

## Sheet: KhengDataELife
	sex	dob	wt	d0	d1	d2	d3	d7	d14	d21	d28	d35	d42	d49	d56	r0	r1	r2	r3	r7	r14	r21	r28	r35	r42	r49	r56	variant	status	g6stat	percentratio
1	F	51	50	13.2	11	9.9	9.8	10.5	10.2	11.2	11.4	11.8	12.7	13.2	12.4	0.8	NA	NA	NA	3	0.2	NA	1.6	NA	NA	NA	0.8	ViangChan Hetero	2	D	0.075
2	M	33	58	14.7	14.9	15.3	12.8	12.3	12.8	13.2	NA	17.1	15.8	15.9	15.7	1.4	NA	NA	NA	NA	NA	NA	NA	NA	NA	NA	NA	ViangChan Homo	2	D	0.0416667
3	M	9	34	11.1	11	10.8	11.5	10.9	11.4	12.7	11.8	12.9	13.5	12.7	13.2	1.6	0.4	0.5	0.5	3.1	NA	NA	3	NA	0.6	0.3	0.8	ViangChan Homo	2	D	0.0916667
4	M	16	40	14.8	10.8	10.2	9	9.9	11.8	13	12.8	12.4	14.2	13.2	12.7	2.2	NA	0.2	0.6	2.1	NA	0.8	1.5	NA	0.6	0.5	1	ViangChan Homo	2	D	0.0666667
5	M	30	54	13.8	13.4	11.9	12.1	12.5	14.1	14.3	13.9	15.3	16.4	15.5	16.3	1.2	NA	NA	NA	2.8	NA	NA	3.2	NA	NA	NA	1	ViangChan Homo	2	D	0.075
6	M	23	60	12.7	13.8	13	12.1	12.6	12.7	12	13.6	15.7	14.6	14	16.2	1.9	NA	NA	0.4	3.5	NA	NA	1	NA	NA	NA	1	ViangChan Homo	2	D	0.0583333
7	M	22	54	12.2	11.2	10.7	11	13	11.2	11.6	12.8	12.4	12.9	13.9	13.7	2.4	0.2	0.3	0.4	4.8	NA	NA	1.4	NA	0.8	NA	1	ViangChan Homo	2	D	0.0833333
8	M	38	50	16	12.7	11	11.3	12	13.6	15.6	15.4	13.8	15.2	17.3	14.9	1.8	NA	NA	NA	2	NA	NA	1	NA	NA	NA	NA	ViangChan Homo	2	D	0.05
9	M	32	88	12.7	11.8	15.2	15.6	13.3	12.8	13.3	15.4	13.6	15.3	15.3	14.9	2	NA	NA	NA	2.3	NA	NA	6	NA	NA	NA	NA	WT	1	N	NA
10	F	15	53	12.4	11.2	10.8	10	10.2	10.8	11.8	NA	14.8	13.9	12.9	13.8	NA	NA	NA	NA	3	NA	NA	NA	NA	NA	NA	NA	ViangChan Hetero	2	D	0.216667
11	M	24	63	11.4	9.5	9.6	9.5	11.5	11.8	12.2	12.2	12.5	12.4	11.8	12.7	3	NA	NA	NA	2.3	0.8	2	0.7	1	0.8	0.5	0.6	WT	1	N	1.10833
12	M	18	49	14.5	12.4	13.1	13.5	12.9	12	13.2	12.4	12.4	10.6	12.7	14.8	2.5	1.1	0.9	1.1	1.7	0.3	1.5	1.8	1.1	1.4	0.3	1.1	WT	1	N	1.05833
13	M	27	57.5	11.7	10	10.6	9.8	9.8	9.9	11.7	13	10.4	9.8	10.9	13.3	NA	NA	2	1.2	NA	8.5	5	4.8	2.8	1	1.2	2	ViangChan Homo	2	D	0.108333
14	M	27	51.5	13.8	12.7	11.2	12.6	13.1	12.6	15.2	13.6	12.6	13	14.6	14	1	1.2	1.5	0.8	1.8	1.8	1.5	1.6	1	0.3	NA	0.6	WT	1	N	1.11667
15	F	9	18.5	10.7	10.6	10.2	10.7	10.7	11.4	12.2	12.6	11.8	11.8	12.8	12.6	1.5	1	1.1	2.3	7	4.4	1.4	1.7	NA	NA	1	1.2	WT	1	N	0.608333
16	M	24	54	10.9	10	9.4	10.9	12.3	9.5	11.9	11.3	11.9	11.9	10.7	11.8	1	1	0.6	1	1.8	2	0.6	1.5	0.8	0.4	2.6	1.1	WT	1	N	1.38333
17	M	26	54	13	11.3	12.3	12.2	14.4	11.6	13.4	14.7	13.5	13.6	13.4	13.4	1.8	1.4	1	1.6	4	2.7	1.8	1.9	0.8	0.8	1	0.7	WT	1	N	0.783333
18	M	63	42.5	12.2	11.4	12.1	11.5	11.7	12.7	12.9	13	12	13.7	11.9	12.5	2	0.5	0.6	0.6	1.1	1.3	1.5	0.3	2	2.1	0.5	1.3	WT	1	N	1.43333
19	M	33	65.5	14.7	14.1	14.1	14	13.7	14.2	14.4	15	13.9	15.4	14.7	14.8	4.5	3	2.7	2.6	1.9	2.3	4	3.1	2.5	1.2	1.2	1.5	WT	1	N	0.966667
20	M	20	56	13	12.5	10.8	13.8	13.4	12.2	11.6	13.3	13.8	14.5	16.1	14.8	2.8	0.9	0.8	0.6	3.2	4	0.4	1.6	1	1.3	2.5	1.7	WT	1	N	0.875
21	M	36	59.5	13.9	12.3	12.6	13.1	12.5	14.6	13	12.9	14.6	13.4	13.7	14.6	0.6	0.8	0.7	1.2	1.7	0.3	0.3	1.9	2.6	2.1	2	NA	WT	1	N	0.841667
22	M	25	63.5	11.4	12.2	12.1	12.3	12.8	NA	NA	NA	NA	NA	NA	NA	1.6	NA	NA	1	2.7	NA	NA	NA	NA	NA	NA	NA	WT	1	N	1
23	F	56	63	12.6	10.1	10.7	10.8	11.7	10.1	11.9	10.9	12.5	11.7	11.7	13.7	3.8	3.5	3.6	3.8	2.6	3	1.5	4.4	5	0.8	2	2.4	ViangChan Hetero	2	D	0.108333
24	M	29	51.5	13.1	12.5	10.9	10.6	11.5	10.9	10.3	11.5	11.3	11.5	13	13.4	1.3	0.5	0.7	0.6	2.4	0.8	1	0.3	2	1.5	1	1.6	WT	1	N	1.03333
25	F	40	51	12	11.8	11.2	11.7	12.4	12.1	13.2	13.2	13.3	12.8	13.9	14.6	1.1	0.8	0.6	0.6	2	0.4	2.2	1.5	0.5	1.2	2	1.2	WT	1	N	0.9
26	M	32	49.5	14.4	12.4	13.1	13.3	14.6	13.2	10.9	NA	NA	NA	NA	NA	1	1	1.3	0.3	1.2	NA	1.5	NA	NA	NA	NA	NA	WT	1	N	1.35
27	F	46	59.5	10.6	10.8	9.6	9.3	9.8	10	11.5	12.4	11.3	12.1	11.9	11.7	1.6	0.5	1.7	1.3	2	3.2	2	1.5	0.4	1.5	2.6	0.8	WT	1	N	1.49167
28	M	35	45	14.1	10.9	14.6	12.6	13.6	14.1	16.2	15.3	14.8	16.4	15.5	13.3	1.1	2.1	0.6	0.5	2.8	0.4	1.4	1.7	0.8	2	2.3	0.7	WT	1	N	1.025
29	M	20	48.5	12	10	10.1	10.5	9.9	12.5	12.3	11.9	13.4	13.1	14.4	13.9	1.2	0.2	0.5	0.6	2.7	1.6	1.2	0.5	2	0.5	0.5	0.4	WT	1	N	1.54167
30	M	41	67	11.6	11	12.5	12.8	12.9	13.7	12.6	13.8	13.6	13.8	14	14.1	3.6	0.8	0.5	1.6	3.9	2.1	1.2	1.1	0.8	2	0.7	2	WT	1	N	1.23333
31	M	33	66	13.3	10.8	11.7	11.5	10.5	13.1	12.7	12.8	13.4	13.7	13.9	13.9	1.2	0.6	0.6	2	2.6	1	1	2.5	2.8	1.4	0.5	1.7	ViangChan Homo	2	D	0.125
32	M	34	50	11.5	14.8	14.4	13.7	14.3	NA	NA	NA	NA	NA	NA	NA	1.3	1.2	0.2	0.2	1.8	NA	NA	NA	NA	NA	NA	NA	WT	1	N	0.85
33	M	20	49	15.6	12.5	12.4	13	14.9	13.6	13.4	14.6	15.2	14	13.9	17.2	1.1	NA	NA	0.4	1.2	2	1.3	1.7	0.8	0.6	1.6	1.7	WT	1	N	1.28333
34	M	40	46.5	11.3	10.2	9.2	10.3	11.3	10.2	12.1	11.3	11.3	11	12.7	12.2	1.1	0.1	0.5	0.5	1.2	1.5	0.4	1.7	1	0.6	0.8	0.6	WT	1	N	0.741667
35	M	37	55.5	14.6	12.1	13.1	13	13.7	12.5	14.3	13.1	15.1	NA	NA	NA	1.3	1	2.3	1	1.8	1	1.2	2	1.5	NA	NA	NA	WT	1	N	1.2
36	M	26	60	15.6	15	14.9	15.6	15.3	14.5	14.6	14.9	15.4	14.9	16	15.6	1.3	0.8	0.4	0.2	1	1.5	1	1.4	2	0.8	2.1	0.7	WT	1	N	1
37	M	25	48.5	12.7	11.9	13.4	13.8	15.5	14.6	14.3	13.7	15.5	15.7	15.3	16.1	2.7	2	1.8	NA	3.4	1	1.2	1.5	1.5	0.8	2.2	1.5	WT	1	N	0.925
38	M	21	58	14	14.7	14	13.7	14.3	13.6	14.2	14.3	16.4	14	13	14.2	1.2	0.2	0.3	0.5	1.3	0.6	1	1	1.2	2	0.5	1.3	WT	1	N	1
39	M	25	49	13.9	13.7	13.1	12.5	12.2	13.2	13.9	14.9	15.9	17.1	17	16	1.3	1	1.1	0.4	1.7	2	3	2.3	0.5	0.5	0.9	1.8	WT	1	N	1.08333
40	F	12	27.5	9	9.3	8.8	8.3	9.9	10.3	10.5	10.4	10.2	10.6	10.7	11.1	1.4	1	0.5	1	2.3	1.5	1.5	1.4	0.4	0.5	1	0.9	WT	1	N	1.18333
41	F	14	31	10.6	9.8	9.2	9.7	10.2	10.4	10.8	11.1	11.1	11.5	11.8	11.6	0.8	0.9	NA	0.5	3.6	0.9	1.4	1.2	0.6	1.2	0.5	0.8	WT	1	N	0.666667
42	M	24	57	13.5	13.7	12.9	13.5	12.7	12.5	12.7	14.5	13.8	13.9	14.8	13.7	1.1	1	1.2	0.8	2.7	0.9	0.7	0.8	0.5	1.4	0.8	0.5	WT	1	N	1.04167
43	M	22	63	14.6	13.4	13.8	13.1	13	12.9	13.3	13.8	15.3	12.8	13.1	14.1	1.1	0.4	1	1.2	1.4	1.2	1	0.5	1	2.6	1.2	2.2	WT	1	N	1.10833
44	M	24	54.5	14.8	14.4	13.8	15.4	15.4	14.4	15.3	15.6	16.1	15.5	15.5	15.7	2.8	1.7	1.2	1.5	1.6	1.3	2	5.3	2.3	1.3	1.7	0.5	WT	1	N	0.908333
45	M	23	56.5	12.7	12.1	11.8	11.2	11.3	11.6	11.2	12.1	12.9	12.4	14.1	13.8	1.5	1.2	1	0.5	2	2	1.5	0.5	0.7	1.4	1.8	1.2	WT	1	N	1.14167
46	M	23	54	11.9	11.6	11.5	11.1	11.1	13.6	NA	NA	NA	NA	NA	NA	0.5	0.4	1	1	2.8	4.8	NA	NA	NA	NA	NA	NA	WT	1	N	0.941667
47	M	7	14	9.4	8.7	8.9	9.5	9.5	10	8.7	9.5	9.8	9.7	9.4	9.3	1.8	0.6	NA	1	2.1	1	3.1	1.8	2	1	1	2.2	WT	1	N	1.11667
48	M	17	51.5	15.5	14.3	13.8	13.5	13.3	13.4	13.2	14.1	14.4	14.5	14.8	13.8	1.4	0.4	0.6	0.6	1.5	1	1.6	2.5	1.2	4	1.2	1.3	WT	1	N	0.908333
49	M	18	48.5	12.5	12.1	11.8	12.3	12.6	12.1	13.8	13.8	13	13.5	13	12.6	1.3	0.4	0.2	NA	2.4	3	1.8	2.2	1	1.5	2.5	2.6	WT	1	N	0.758333
50	M	27	60	14.6	14.4	14.4	14.8	12.4	13.3	14	15.1	15.3	15.8	15.9	15.8	1.6	1.5	1	2.6	1.6	3	4	3	2	2.7	2	2	ViangChan Homo	2	D	0.1
51	M	34	56.5	15.8	14.5	14.5	14.5	15.7	15.5	16.4	13.9	14.8	15.5	17.3	15.6	1	1.2	0.5	1.1	3.5	1.5	0.8	0.7	2	1	2.2	1.8	WT	1	N	0.975
52	M	24	53	14.5	13	12.8	12.7	13	12.8	12.6	12.2	12.7	12.6	13.2	13	1.8	1.2	1.2	0.5	0.6	0.6	0.8	0.9	0.8	3.5	0.6	1.1	WT	1	N	1.15833
53	F	45	46	14.1	12.6	12.1	12.2	12.4	13	12	12.4	12.3	11.6	12.1	13.5	1.8	0.5	0.6	0.5	3.5	1.7	0.8	2.3	2.7	0.5	5	2.3	WT	1	N	0.775
54	M	11	23	12.8	11.2	10	9.1	8.9	10	11.4	13	12.9	12.2	14.2	13.6	0.6	0.5	1.8	0.6	5.8	10.5	0.8	1.5	2.1	0.5	1.5	0.7	ViangChan Homo	2	D	0.0666667
55	M	25	65	13.5	12.5	12.2	12.5	12.9	13.3	13.9	14.5	14.9	13.8	13.7	14.9	2.8	2.8	2.3	1	1	4.1	1.3	1.7	1.6	NA	1.7	1.9	WT	1	N	1.28333
56	M	17	54	12.5	11.7	12.4	12	11.9	12	12.4	12.7	14.3	13.1	13.6	13.2	0.7	1.8	0.7	1	1.4	0.9	1	1	1.5	4	2.5	1.6	WT	1	N	0.983333
57	M	15	42	13.5	12	12.4	12.2	13.5	13.8	14.4	13.9	15.4	15.1	15	14.8	1.5	0.7	0.8	0.3	2.5	1.2	1.3	1.2	1.3	1	1.6	1.4	WT	1	N	0.933333
58	M	42	54.5	14.8	14.3	13.7	13.6	14.6	13.6	15.1	14.7	14.2	15.1	14.6	14.1	1.3	0.4	0.7	0.3	2.1	1.7	1	1.1	0.6	1.5	3.2	1.3	WT	1	N	1.025
59	M	39	52	16.3	14.4	14.2	14	14.3	12.1	14	14.3	14.2	14.8	14.8	15.2	1	0.6	0.8	0.4	1	3.1	1	0.4	2.8	0.7	1.2	1	WT	1	N	0.6125
60	M	24	53	14.3	14	13	14.1	14.8	13.5	15.3	13.1	13.1	14.3	14.6	14	1.8	0.3	1	0.3	1.4	0.4	1.1	1.7	0.6	0.3	0.5	0.8	WT	1	N	1.09167
61	M	23	51.5	15.6	15.3	14.1	15.3	14.7	15.5	16	16.1	16.2	16.6	16.7	16.3	1.6	1.1	2	0.6	2.2	2	1.3	1	2	1.7	0.7	1	WT	1	N	0.916667
62	M	39	60	12.5	12.1	11.7	12.2	14.6	11.4	14.6	13	13.7	13.3	14.7	14.6	0.5	0.4	0.5	0.4	2.6	2	1.4	1.8	1.4	0.5	0.8	1	WT	1	N	0.633333
63	F	36	44.5	13.9	14.3	13.8	13.4	11.9	12	14.2	13.5	13.6	13	13.4	13.6	0.9	1	0.8	1.8	1.6	0.5	0.5	1	0.5	0.7	0.5	2	WT	1	N	0.866667
64	M	20	65	15.1	13.7	12.9	14	14.1	14.2	14.8	16	15.1	17	16.2	16.9	1.4	0.6	0.8	0.4	1.5	1	2	2.4	0.7	1.2	0.8	0.8	WT	1	N	0.791667
65	M	18	57.5	13.8	13.5	13.6	13	12.8	12.8	13.1	12.6	13.1	13.7	14.3	14.4	0.7	0.7	0.6	1	1.7	0.6	0.8	1.1	1.8	0.5	0.7	1	WT	1	N	1.03333
66	M	23	49	10	8.8	8.2	7.5	NA	NA	NA	NA	NA	NA	NA	NA	3.3	2.5	1.6	2.1	NA	NA	NA	NA	NA	NA	NA	NA	ViangChan Homo	2	D	0.00833333
67	M	14	31.5	13.2	12.4	11.8	12	13	14.1	13.2	12.9	12.8	13.9	12.7	15.1	0.8	0.5	0.5	0.4	1.4	0.5	0.6	0.9	1	0.9	0.5	1.2	WT	1	N	1.025
68	M	15	46	13.2	12.2	13.3	13.1	13.7	13.7	14.6	15.4	13.9	15	14.3	14.4	1.6	1.8	0.3	0.3	1.6	2	0.3	1.5	0.7	0.5	0.6	1.5	WT	1	N	0.858333
69	M	22	54.5	13.9	11.7	11.3	11.5	10.7	12.2	13.6	14.6	14.6	15.2	14.2	15.4	2.6	1.8	0.8	0.3	6	2.6	2.8	3	NA	NA	1	1.7	ViangChan Homo	2	D	0.0583333
70	M	5	20	9.6	8.2	9.4	9	10	9.7	11	12.2	11.5	11.6	11.1	13.3	1.5	0.3	NA	0.3	2	2	NA	0.9	NA	1.3	NA	0.5	ViangChan Homo	2	D	0.108333
71	F	17	45	11.5	10.6	11.1	10.7	10.4	12.6	11.3	12.1	13.6	13.2	11.5	12	0.8	0.3	1.5	1.3	2.5	2.8	2.1	1.4	0.5	1	0.7	0.7	WT	1	N	1.025
72	M	23	62.5	14.8	12.2	12.6	13.9	13.7	15.4	15.2	15.7	13	NA	NA	NA	0.9	1.3	1.3	1.3	1.5	2	1.3	0.8	1.2	NA	NA	NA	WT	1	N	1.34167
73	M	30	67	14.8	13.5	11.3	13.9	13.9	13.9	13.9	12.8	14.4	14.4	13.8	15.2	1.4	0.8	1.8	2.8	2.6	1	0.8	2	1.2	NA	0.8	1.1	WT	1	N	0.95
74	M	44	NA	13.5	11.8	11.2	10.6	10.9	11	12	12.2	13.1	13	14.1	14.7	1.9	0.9	0.8	0.6	3.8	0.7	0.8	1.5	NA	NA	NA	NA	Canton	2	D	0.0666667
75	F	22	NA	14.2	13.5	11.9	14.5	15.4	14.7	15.9	15	NA	NA	NA	NA	1	NA	NA	NA	1.2	NA	NA	NA	NA	NA	NA	NA	WT	1	N	0.775
